# Supplementary material for: Impact of Precipitation Patterns on Biomass and Species Richness of Annuals in a Dry Steppe
Source: PLoS One. 2015 Apr 23;10(4):e0125300. doi: 10.1371/journal.pone.0125300 (PMC4407894; doi:10.1371/journal.pone.0125300)
Supplement: S1 File — (XLS) [file pone.0125300.s001.xls]

## Sheet: Sheet1
Year	Annual precipitation (mm)	Growing-season precipitation (mm)	Spring precipitation (mm)	May precipitaion (mm)	AGB(Aboveground biomass of annuals (g/m2))	Relative AGB of annuals (%)	Species Richness	Mean Annual Temperature (℃)	Mean Growing-season Temperature (℃)	Mean Spring Temperature (℃)	Interannual variation	CV AGB
1982	283.2	246.1	37.2	60.6	3.28	1.23	1.8	0.68	1.24	0.27
1983	289.9	243.1	13.3	31.5	10.5	8.13	2.45	0.18	1.31	0.15	1982-1983	0.74
1984	317.7	276.9	23.6	47.8	15.75	7.56	3.75	-0.28	1.29	0.11	1983-1984	0.28
1985	318	270	37.3	50.3	10.07	5.12	2.55	-1.59	1.25	0.08	1984-1985	0.31
1986	429.1	370.8	13.1	19	5.64	2.93	1.9	-1.53	1.2	0.09	1985-1986	0.4
1987	328.9	284.7	27.9	41	1.66	0.77	1.85	0.06	1.25	0.05	1986-1987	0.77
1988	311	279.6	32.2	39	3.56	1.44	2.45	0.39	1.3	0.02	1987-1988	0.51
1989	289.1	247.8	31.2	36.9	2.83	2	1.95	1.88	1.27	0.33	1988-1989	0.16
1990	454.3	412.4	18.1	35.5	7.63	3.82	4.3	1.39	1.25	0.31	1989-1990	0.65
1991	374.2	303.7	7.5	32	6.83	3.56	4.35	0.72	1.3	0.16	1990-1991	0.08
1992	455	381.9	83.6	105.9	11.54	6.56	2.7	0.05	1.23	0.19	1991-1992	0.36
1993	363.2	312.8	19.5	38	15.46	6.52	1.3	-0.3	1.25	0.17	1992-1993	0.21
1995	310.6	252.7	19	19.3	—	—	—	1.46	1.34	0.26	1993-1994	0.67
1996	290.2	222.2	28.8	23.1	—	—	—	1.26	1.25	0.17	1994-1997	—
1994	310.6	252.7	9.4	19	5.51	3.11	0.95	0.62	1.26	0.23	1997-1998	0.25
1997	298.6	264.3	49.3	66.4	1.96	1.01	1	1.6	1.33	0.29	1998-1999	0.59
1998	507	419.4	36.5	83.8	2.82	1.28	1.6	2.51	1.33	0.52	1999-2000	1.05
1999	332	288.6	53.9	63.5	1.15	0.54	0.65	1.87	1.37	0.3	2000-2001	1.16
2000	314.1	243.3	49.8	75.7	0.17	0.14	0.3	0.67	1.47	0.26	2001-2002	0.6
2001	286.1	236.8	25.1	37.2	1.74	1.03	1.4	1.84	1.45	0.33	2002-2003	0.33
2002	259.5	213.2	14.4	39.6	0.71	0.29	0.8	2.31	1.41	0.45	2003-2004	0.52
2003	371	334	46.2	60.9	0.44	0.22	—	1.58	1.32	0.36	2004-2005	1.1
2004	324.6	288.3	22.8	30.9	0.95	0.52	0.75	2.28	1.32	0.34	2005-2006	1.34
2005	166.1	141.5	10.8	13.4	0.12	0.1	0.55	0.79	1.39	0.22	2006-2007	0.67
2006	274	232.8	4.7	10.5	4.53	3.43	—	0.65	1.18	-0.06	2007-2008	0.72
2007	240.1	192	46	69.1	6.06	3.33	2.1	2.5	1.46	0.26	2008-2009	1.4
2008	362.2	294.8	28	65.1	18.72	7.9	2.2	1.92	1.35	0.43	2009-2010	—
2009	281.4	183.3	13.8	69.2	0.09	0.1	—	1.41	1.4	0.43	2010-2011	1.28
2010	318.5	215	96	125.4	27.58	14.17	1.25	0.97	1.45	0.03	2011-2012	0.98
2011	286.7	243.2	12.2	19.2	1.33	0.72	0.5	-0.05	1.2	0.22
2012	443.4	406.8	34.4	62.7	7.29	3.58	1.65	—	1.33	0.24
